# Supplementary material for: Longitudinal Liver Stiffness Assessment in Patients with Chronic Hepatitis C Undergoing Antiviral Therapy
Source: PLoS One. 2012 Oct 17;7(10):e47715. doi: 10.1371/journal.pone.0047715 (PMC3474716; doi:10.1371/journal.pone.0047715)
Supplement: Table S1 — Liver stiffness, APRI, FIB-4 index and ALT evolution (mean delta change) from baseline to end of study. (DOC) [file pone.0047715.s002.doc]

**Table S1. Liver stiffness, APRI, FIB-4 index and ALT evolution (mean** delta change) from baseline to end of study

|  | **Treated** | | | | **Untreated** |
| --- | --- | --- | --- | --- | --- |
|  | | | |
|  | **All (n:323)** | **SVR** | **RR** | **NR** |
| **FibroScan** | -1.9 4.5* | -24 | -2.35.8 | -1.14.4 | 0.031.8* |
| **APRI** | -0.20.9* | -0.40.9 | 0.06 0.9 | -0.030.5 | 0.080.3* |
| **FIB-4** | -0.21.3* | -0.31 | 0.21.3 | -0.22 | 0.1 0.4* |
| **ALT** | -76.2120.0* | -96126 | -43.3116 | -4277 | -6.6 43.6* |

** P* <0.0001 treated *vs* untreated

*P <*0.001 SVR *vs* RR and NR
